# Supplementary material
Source: PubMed Central journal article supplement (PMC2774794)
Supplement: NIHMS112517-supplement-2.pdf [file NIHMS112517-supplement-2.pdf]

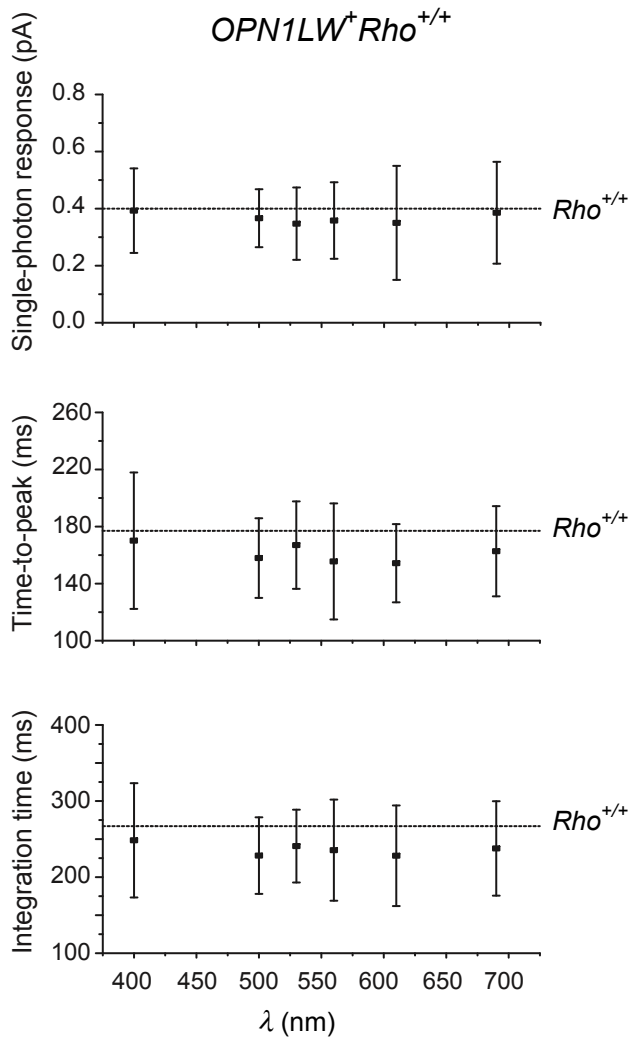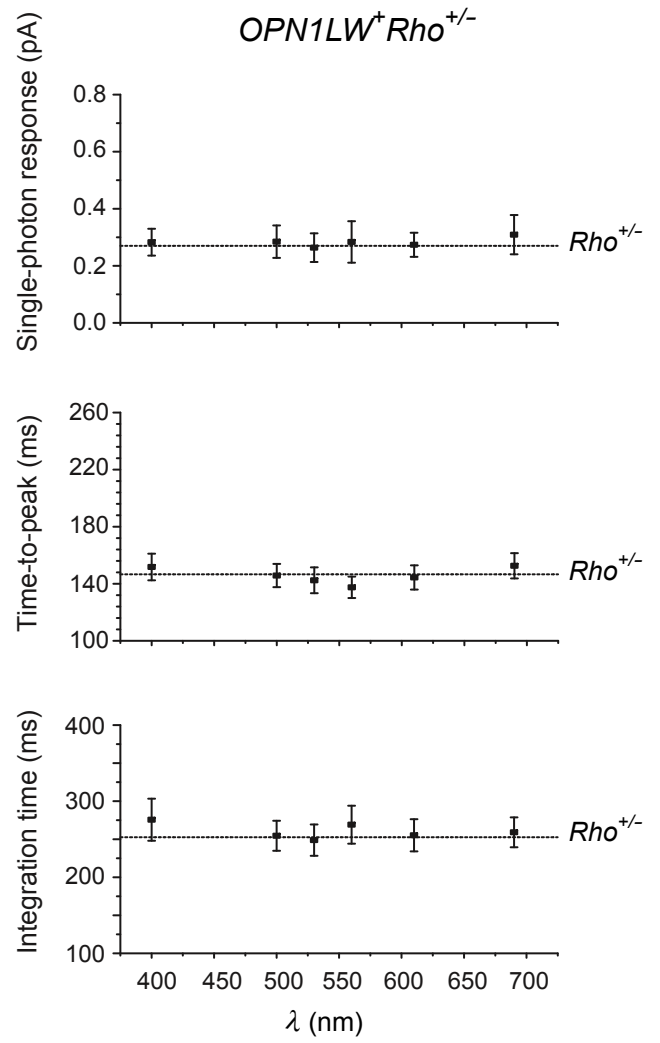

**Supplementary Fig. 1.** Transgenic *OPNILW<sup>+</sup>Rho<sup>+/+</sup>* (left column) and *OPNILW<sup>+</sup>Rho<sup>+/-</sup>* (right column) rods showed invariance in single-photon-response amplitude and dim-flash-response kinetics with stimulating wavelength at 400-690 nm. Repeated dim flashes delivered 65 (400 nm), 24 (500 nm), 32 (530 nm), 152 (560 nm), 3,466 (610 nm) and 634,424 (690 nm) photons  $\mu\text{m}^{-2}$ , respectively. Averaged data from 10 *OPNILW<sup>+</sup>Rho<sup>+/+</sup>* and 11 *OPNILW<sup>+</sup>Rho<sup>+/-</sup>* rods. Error bars give SEM. According to the spectral templates, light at 610 nm and 690 nm should discriminate for one or the other pigment by 36- and 245-fold, respectively. Based on the expression level of red cone pigment ( $\sim 0.25\%$  for *OPNILW<sup>+</sup>Rho<sup>+/+</sup>* rods and  $\sim 0.5\%$  for *OPNILW<sup>+</sup>Rho<sup>+/-</sup>* rods), however, this pigment should hardly be excited at  $\lambda < 610$  nm. At 610 nm and 690 nm, 8% and 38%, respectively, of the flash responses should have been triggered by the red cone pigment for *OPNILW<sup>+</sup>Rho<sup>+/+</sup>* rods, and 15% and 54%, respectively, for *OPNILW<sup>+</sup>Rho<sup>+/-</sup>* rods. Dashed lines indicate the parameter value for control *Rho<sup>+/+</sup>* (wild-type) rods (n=10, left) and *Rho<sup>+/-</sup>* rods (n=11, right).

## **Comparison of signaling by endogenous rhodopsin and by transgenic cone pigment in *OPNILW<sup>+</sup>Rho<sup>+/+</sup>* and *OPNILW<sup>+</sup>Rho<sup>+/-</sup>* rods**

Neither the single-photon response amplitude (estimated from variance analysis) nor the kinetics (time-to-peak and integration time) of the dim-flash response of *OPNILW<sup>+</sup>Rho<sup>+/+</sup>* rods varied with the stimulating wavelength (**Supplementary Fig. 1**, left column), both being similar to *Rho<sup>+/+</sup>* (dashed lines). The same was found for *OPNILW<sup>+</sup>Rho<sup>+/-</sup>* rods, which expressed half the normal amount of rhodopsin<sup>1</sup> (**Supplementary Fig. 1**, right column). These results suggested that rhodopsin and red cone pigment signaled identically in a given rod. Other supporting evidence is provided in the main text.

## **Effect of dark quantal noise on cone sensitivity**

In amphibians such as salamander, green rods and blue cones share the same blue pigment<sup>2</sup> and also show similar single-photon-response amplitudes and kinetics<sup>2-4</sup>, suggesting that the visual pigment may dictate the response properties of rods and cones. Based on this reasoning, the rather high spontaneous activity of the A<sub>2</sub> pigment in salamander red cones<sup>3,5</sup> is expected to account for the bulk of the sensitivity difference between these cells and salamander red rods under dark-adapted conditions<sup>5</sup>. If A<sub>1</sub> and A<sub>2</sub> red cone pigments were to have similar spontaneous isomerization rates, the same reasoning<sup>5</sup> would suggest ~10-fold out of an overall~100-fold difference in sensitivity (or ~half, because the numbers-of-fold multiply with each other) between primate rods and primate red cones being caused by red cone pigment activity, based on the background-adaptation curve of primate rods<sup>6</sup>. However, given our present finding that A<sub>1</sub> red cone pigment is in fact ~40-fold less spontaneously active than the A<sub>2</sub> counterpart, the dark quantal rate in primate red cones should – even if the above reasoning is

adopted – account negligibly (less than 2-fold) for the overall ~100-fold difference in sensitivity between these cells and primate rods.

From a different perspective, however, we have previously pointed out<sup>7</sup> that the situation with salamander green rods/blue cones may be rather unusual, so the above reasoning based on the comparison of these particular rod/cone types may not be generally valid. Instead, a lower amplification is probably built into each of the phototransduction stages in cones<sup>8</sup>, in conjunction with quantitatively different Ca<sup>2+</sup>-feedbacks<sup>9,10</sup>. If so, regardless of whether the spontaneous isomerization rate of a cone pigment is high or low, a much stronger background light will still be required to produce the same desensitization in cones as in rods; in other words, rods and cones do not operate on the same basic Weber-Fechner adaptation curve (see detailed Discussion in Ref. 7). Applying this alternative viewpoint to primate cones, one can start with the Weber-Fechner relation for background adaptation measured in these cells<sup>11</sup>:

$$S_F = S_F^D I_0 / (I_B + I_0)$$

where  $S_F^D$  is the flash sensitivity in the absence of background light,  $S_F$  is the flash sensitivity in the presence of a background light  $I_B$ , and  $I_0$  is a constant that designates the background intensity required to reduce the cone sensitivity to half of its dark value. For primate red cones,  $I_0 \sim 26,000 \text{ R}^* \text{ sec}^{-1}$  (Ref. 11). In other words, it would require a very large number of  $\text{R}^* \text{ sec}^{-1}$  in order to decrease the sensitivity of a primate red cone by half; thus, removing an equivalent background light of a mere  $8.8 \text{ R}^* \text{ sec}^{-1}$  as we obtained (see main text) would hardly increase its sensitivity. This can explain why primate red, green and blue cones all have similar sensitivities irrespective of their difference in visual pigments<sup>11</sup>.

## REFERENCES

1. J. Lem, et al. Morphological, physiological, and biochemical changes in rhodopsin knockout mice. *Proc. Natl. Acad. Sci. USA* **96**, 736-741 (1999).
2. Ma, J. et al. A visual pigment expressed in both rod and cone photoreceptors. *Neuron* **32**, 451-461 (2001).
3. Rieke, F., & Baylor, D. A. Origin and functional impact of dark noise in retinal cones. *Neuron* **26**, 181-186 (2000).
4. Perry, R. J., & McNaughton, P.A. Response properties of cones from the retina of the tiger salamander. *J. Physiol.* **433**, 561-587 (1991).
5. Kefalov, V., Fu, Y., Marsh-Armstrong, N., & Yau, K.-W. Role of visual pigment properties in rod and cone phototransduction. *Nature* **425**, 526-531 (2003).
6. Tamura, T., Nakatani, K., & Yau, K.-W. Calcium feedback and sensitivity regulation in primate rods. *J. Gen. Physiol.* **98**, 95-130 (1991).
7. Kefalov, V. et al. Breaking the covalent bond – a pigment property that contributes to desensitization in cones. *Neuron* **46**, 879-890 (2005).
8. Tachibanaki, S., Shimauchi-Matsukawa, Y., Arinobu, D., & Kawamura, S. Molecular mechanisms characterizing cone photoresponses. *Photochem. Photobiol.* **83**, 19-26 (2007).
9. Nakatani, K., & Yau, K. W. Sodium-dependent calcium extrusion and sensitivity regulation in retinal cones of the salamander. *J. Physiol.* **409**, 525-548 (1989).
10. Miller, J. L., Picones, A., & Korenbrot, J. I. Differences in transduction between rod and cone photoreceptors: an exploration of the role of calcium homeostasis. *Curr. Opin. Neurobiol.* **4**, 488-495 (1994).
11. Schnapf, J. L., Nunn, B. J., Meister, M., & Baylor, D. A. Visual transduction in cones of the monkey *Macaca fascicularis*. *J. Physiol.* **427**, 681-713 (1990).
